# Supplementary material for: Machine learning-enabled cancer diagnostics with widefield polarimetric second-harmonic generation microscopy
Source: PubMed Central journal article supplement (PMC9206659; doi:10.1038/s41598-022-13623-1), 2022-06-18
Supplement: 41598_2022_13623_MOESM4_ESM.pdf [file 41598_2022_13623_MOESM4_ESM.pdf]

<sup>1</sup> **Supplementary Document: Machine learning-enabled**  
<sup>2</sup> **cancer diagnostics with widefield polarimetric**  
<sup>3</sup> **second-harmonic generation microscopy**

<sup>4</sup>

## 5 **Supplementary Note: Calculation of SHG polarimetric** 6 **parameters**

7 The polarimetric measurements were achieved using a polarization state analyzer (PSA) and a  
8 polarization state generator (PSG), according to double Stokes Mueller polarimetry (DSMP) [1].  
9 Here, we introduce reduced DSMP, that enables fast computation of SHG polarimetric parameters  
10 without pixel-to-pixel model fitting.

11 Using reduced DSMP, the SHG polarimetric parameters were obtained by measuring four outgoing  
12 polarization states of the SHG signal with PSA, for each of the four incoming polarization states  
13 generated by PSG, resulting in 16 polarization state combinations of the PSA and PSG. The Stokes  
14 vector formalism is used on the SHG signal for calculation of the polarimetric parameters.

15 The SHG stokes vector is defined as:

$$s = (s_0, s_1, s_2, s_3)^T \quad (1)$$

16 , where  $s_0$ ,  $s_1$ ,  $s_2$ , and  $s_3$  represent the total intensity,  $0^\circ$  and  $90^\circ$  linearly polarized,  $\pm 45^\circ$  linearly  
17 polarized, and circularly-polarized components, respectively.

18 Polarization of the SHG signal measured by the camera,  $s'$ , can be describe by [2]:

$$s' = M_{PSA}s \quad (2)$$

19 , where  $M_{PSA}$  represents the Muller matrix of the PSA, and  $s$  is the polarization state of the  
20 generated SHG signal at the sample. The PSA contains a liquid crystal variable retarder (LCVR)  
21 and a polarizing beam splitter (PBS). The LCVR was placed at  $45^\circ$  with respect to the laboratory  
22 axis, resulting in the following Mueller matrix [3]:

$$M_{LCVR}(\delta) = \begin{pmatrix} 1 & 0 & 0 & 0 \\ 0 & \cos(\delta) & 0 & -\sin(\delta) \\ 0 & 0 & 1 & 0 \\ 0 & \sin(\delta) & 0 & \cos(\delta) \end{pmatrix} \quad (3)$$

23 , where  $\delta$  represents the retardance. In addition, the PBS Mueller matrix in horizontal transmission

24 configuration is provided by

$$M_{PBS} = \frac{1}{2} \begin{pmatrix} 1 & 1 & 0 & 0 \\ 1 & 1 & 0 & 0 \\ 0 & 0 & 0 & 0 \\ 0 & 0 & 0 & 0 \end{pmatrix} \quad (4)$$

25 Thus, the Mueller matrix of PSA ( $M_{PSA}$ ) containing the LCVR and PBS is calculated as:

$$M_{PSA}(\delta) = M_{PBS}M_{LCVR}(\delta) = \frac{1}{2} \begin{pmatrix} 1 & \cos(\delta) & 0 & -\sin(\delta) \\ 1 & \cos(\delta) & 0 & -\sin(\delta) \\ 0 & 0 & 0 & 0 \\ 0 & 0 & 0 & 0 \end{pmatrix} \quad (5)$$

26 By treating  $s$  as an input Stokes vector for the PSA, the outgoing Stokes vector,  $s'$ , is calculated  
 27 using (2). Only the first component of  $s'$  vector, corresponding to the full intensity of the SHG  
 28 signal, is detected by the camera; hence, the measured intensity can be expressed by:

$$s'_0(\delta) = \frac{1}{2}(s_0 + s_1 \cos(\delta) - s_3 \sin(\delta)) \quad (6)$$

29 Four polarization states were measured with LCVR retardance values of  $\delta = \{\pi/2, \pi, 3\pi/2, 2\pi\}$ ,  
 30 corresponding to quarter-wave ( $\lambda/4$ ), half-wave ( $\lambda/2$ ), three-quarter-wave ( $3\lambda/4$ ), and full-wave ( $\lambda$ )  
 31 retardance, respectively. Note that for a vertically polarized laser source, retardances  $\delta = \{\pi, 2\pi\}$   
 32 correspond to orthogonal horizontal and vertical linear polarizations (HLP and VLP), respectively.  
 33 Analogously,  $\delta = \{\pi/2, 3\pi/2\}$  correspond to orthogonal left and right circular polarizations (LCP  
 34 and RCP), respectively.

35 The measurements result in four instances of (6), each comprised of  $s_0$ ,  $s_1$  and  $s_3$  SHG Stokes vector  
 36 components, therefore, the following measurement matrix can be defined:

$$\begin{pmatrix} s'_0(\pi/2) \\ s'_0(\pi) \\ s'_0(3\pi/2) \\ s'_0(2\pi) \end{pmatrix} = \frac{1}{2} \begin{pmatrix} 1 & 0 & -1 \\ 1 & -1 & 0 \\ 1 & 0 & 1 \\ 1 & 1 & 0 \end{pmatrix} \begin{pmatrix} s_0 \\ s_1 \\ s_3 \end{pmatrix} \quad (7)$$

37 To take advantage of all measured data, four subsystems of three equations were solved to compute  
 38  $s_0$ ,  $s_1$  and  $s_3$  and the results were averaged to improve the robustness and accuracy. The remaining

39  $s_2$  component of  $s'$  vector can be measured by probing elliptical polarization states with one LCVR  
 40 or by introducing an additional LCVR in the PSA, however, computation of this component is  
 41 omitted in this article.

42 The above analysis is repeated for each of the 4 incident laser polarization states, as prepared  
 43 by the PSG using an infrared LCVR oriented at  $45^\circ$  with respect to the laser beam polarization.  
 44 The PSG polarization states included the same retardances used in the PSA, corresponding to  
 45 horizontal and vertical linear polarizations ( $\delta = \{\pi, 2\pi\}$ ), and left and right circular polarizations  
 46 ( $\delta = \{\pi/2, 3\pi/2\}$ ), respectively. The resulting combination of 16 incident and outgoing polarization  
 47 states provides a set of 12 Stokes vector elements, which can be expressed as:

$$s_{rDSMP} = \{s_0^{HLP}, s_1^{HLP}, s_3^{HLP}, s_0^{VLP}, s_1^{VLP}, s_3^{VLP}, s_0^{RCP}, s_1^{RCP}, s_3^{RCP}, s_0^{LCP}, s_1^{LCP}, s_3^{LCP}\} \quad (8)$$

48 , where the superscripts denote the PSG polarization state (incident polarization), and the subscripts  
 49 indicate the component of the resulting SHG signal at the sample. These elements are then used to  
 50 compute 5 polarimetric parameters: SHG intensity with circularly-polarized light, R-Ratio, degree  
 51 of circular polarization (DCP), SHG circular dichroism (SHG-CD), and SHG linear dichroism (SHG-  
 52 LD). The equations for the polarimetric parameters in terms of the Stokes vector components  
 53 correspond to equations 2-6 in the “polarimetric parameter calculations” section of the Methods.

## 54 **Supplementary Note: Optimal data discretization for** 55 **texture analysis**

56 Texture analysis of the calculated polarimetric parameter images provides additional insight on the  
 57 tissue ultrastructure in the form of a scalar score when computed over an image [4, 5, 6, 7]. A  
 58 simple implementation of texture analysis over the whole image area could be performed; however,  
 59 given the large field of view provided by widefield P-SHG microscopy, computed texture parameters  
 60 would disregard the small-scale structural variations of the ECM. In order to highlight local texture  
 61 variations of the tissue, polarimetric parameter images are subdivided, and texture analysis is  
 62 performed on smaller sub-images. Investigations on the optimal number of sub-images is shown in  
 63 Supplementary Note 3. In addition, mean and mean absolute deviation (MAD) of the polarimetric  
 64 parameter values are calculated for each sub-image. Therefore, the resulting dataset includes the

65 number of pixels corresponding to the SHG signal (pixel density or PD), as well as, statistics (mean  
 66 and MAD) and texture (contrast, correlation, entropy, ASM, and IDM) of the sub-images of each  
 67 widefield polarimetric parameter image, that are then used in classification and machine learning-  
 68 assisted diagnostics.

69 There are 3 requirements for computation of the texture parameters: 1) level of discretization of  
 70 the continuous polarimetric data (the so-called gray levels,  $Ng$ ) [7], 2) The upper ( $UB$ ), and 3) the  
 71 lower bounds ( $LB$ ) of the range of the input polarimetric parameter data.

72 In order to compute  $Ng$  (requirement 1), each sub-image was discretized using the Freedman-  
 73 Diaconis (FD) rule [8], which is commonly used to calculate the optimal bin width of histograms,  
 74  $w_{FD} = 2n^{(-1/3)}IQR(x)$ , where  $IQR(x)$  is the interquartile range of the data ( $x$ ), and  $n$  is the  
 75 number of points in the dataset. Using FD rule,  $Ng$  can be expressed as:

$$Ng = \frac{\max(x) - \min(x)}{w_{FD}} \quad (9)$$

76 , where  $\max(x)$  and  $\min(x)$  denote the minimum and maximum of the polarimetric parameter  
 77 distributions. The above procedure is then repeated for all present sub-images, resulting in a  
 78 distribution of  $Ng$  values. To ensure sufficient discretization of polarimetric parameters, the  
 79 maximum of the  $Ng$  distribution is considered, however, to avoid the effects of extreme outliers,  
 80 the 99th percentile of the  $Ng$  distribution was instead selected for texture analysis.

81 The  $LB$  and  $UB$  (requirements 2 and 3) were selected as the 1st and 99th percentile of each  
 82 sub-image pixel values, respectively, to avoid extreme outliers. Similar to  $Ng$ , these computations  
 83 are performed for all sub-images, resulting in  $LB$  and  $UB$  distributions. Furthermore, to correctly  
 84 represent the true lower and upper bounds of the polarimetric parameters, the 1st and 99th  
 85 percentiles of the  $LB$  and  $UB$  distributions were selected for texture analyses, respectively. It  
 86 should be mentioned that  $LB$  and  $UB$  do not directly correspond to  $\min(x)$  and  $\max(x)$ ,  
 87 respectively, since the latter denotes the absolute minimum and maximum of the polarimetric  
 88 parameters.

89 It is important to examine the effects of image subdivision on tissue classification performance.  
 90 Hence, the above calculations were performed at different subdivision levels, to determine optimal  
 91  $Ng$ ,  $LB$ , and  $UB$  for texture analysis performed at each subdivision level. It is evident that  $Ng$  is  
 92 different for each polarimetric parameter at lower subdivision levels (fewer sub-images per image)

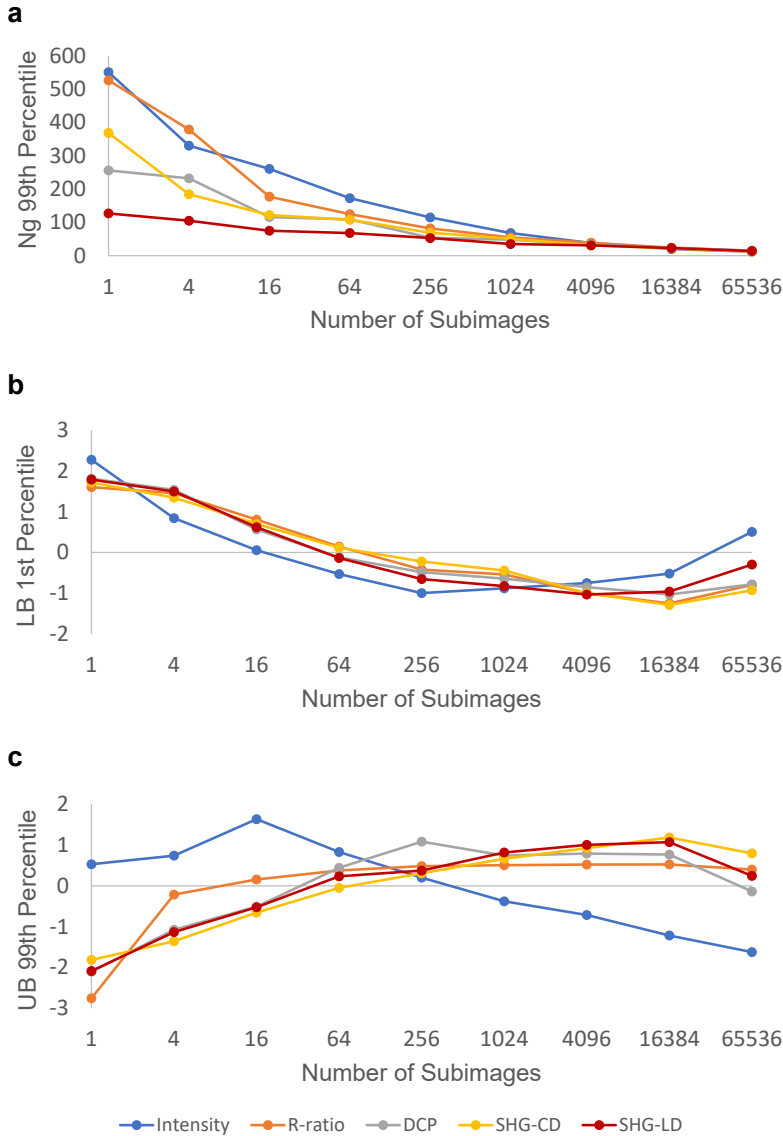

Figure 1: **Optimal discretization of continuous data for texture analysis.** a, Optimal number of gray levels ( $Ng$ ) computed using Freedman-Diaconis rule for each subdivision level. 99th percentile of the  $Ng$  distribution was used to represent maximum  $Ng$ . b-c, Lower ( $LB$ ) and upper bounds ( $UB$ ) of data, represented by the 99th and 1st percentiles of corresponding distributions, respectively. Curves are standardized for better visual comparisons.

93 and decreases with the number of sub-images.  $Ng$  eventually converges to a value between 12 and  
 94 15 at the largest subdivision level due to limited pixel value variations over the small sizes of each  
 95 sub-image (Supplementary Fig. 1a).  
 96 Standardized  $UB$  and  $LB$  curves are shown in Supplementary Fig. 1b-c for better comparison of  
 97 the trends. The standardization involved subtraction of mean from each polarimetric parameters'  
 98  $LB$  and  $UB$ , followed by division by their corresponding standard deviations. Overall, it is  
 99 evident that  $LB$  decreases, while  $UB$  increases with the subdivision level. These trends are  
 100 expected since most of the data are located near the center of the distribution. The SHG intensity  
 101 exhibits highly right-skewed log-normal distributions, so that increasing the number of sub-images  
 102 shortens the tail and decreases  $UB$ . The following section shows how optimal number of sub-images

103 can be found, using the computed  $Ng$ ,  $LB$ , and  $UB$ .

## 104 **Supplementary Note: Optimal number of sub-images**

105 Once the normal and tumor training dataset are computed, the subdivision level was optimized to  
106 maximize classification performance. A series of classification techniques, including linear and  
107 quadratic discriminant analyses, as well as linear and quadratic support vector machines were  
108 used to differentiate between normal and tumor groups [9]. However, the highest degree of  
109 accuracy was achieved by a logistic regression model, which also provided easy-to-interpret  
110 classification probabilities, further enabling computation of an important threshold-independent  
111 performance metric, Brier score [10]. As such, a binary logistic regression classifier was trained  
112 using 1000x repeated 5-fold cross validation at different subdivision levels. The classifier  
113 performance was measured using threshold-dependent metrics (threshold at 50% posterior  
114 probability) such as accuracy, true negative and positive rates, and F1-score, as well as  
115 threshold-independent metrics, including the area under the receiver operating characteristic curve  
116 (AUROC) and Brier score [10, 11]. The mean and standard deviation of the repeated performance  
117 metric measurements were computed to assess the capability and stability of the classifier, as  
118 shown in Supplementary Fig. 2a-b.

119 It is evident that classification without subdivisions, corresponding to 1 sub-image per image,  
120 resulted in poor performance and low stability (highest standard deviation). The classification  
121 performance and stability were enhanced with increasing subdivision level. However, despite  
122 greatest stability at very high levels of subdivision, classification computation time was  
123 significantly lengthened (Supplementary Fig. 2d). Worse yet, a large difference between normal  
124 and tumor data size became apparent in high subdivision levels, which resulted in significant  
125 decrease of the true positive rate and the F1-score (Supplementary Fig. 2c). At high subdivision  
126 levels, the number of sub-images that did not possess SHG signal (thus discarded) increased  
127 disproportionately for tumor tissue due to sparseness of collagen fibers, resulting in the observed  
128 group data size disparity. As seen in Supplementary Fig. 2a, the true negative rate, corresponding  
129 to highly collagenous normal tissue, was unaffected by higher subdivision level and artificially  
130 increased the classification accuracy.

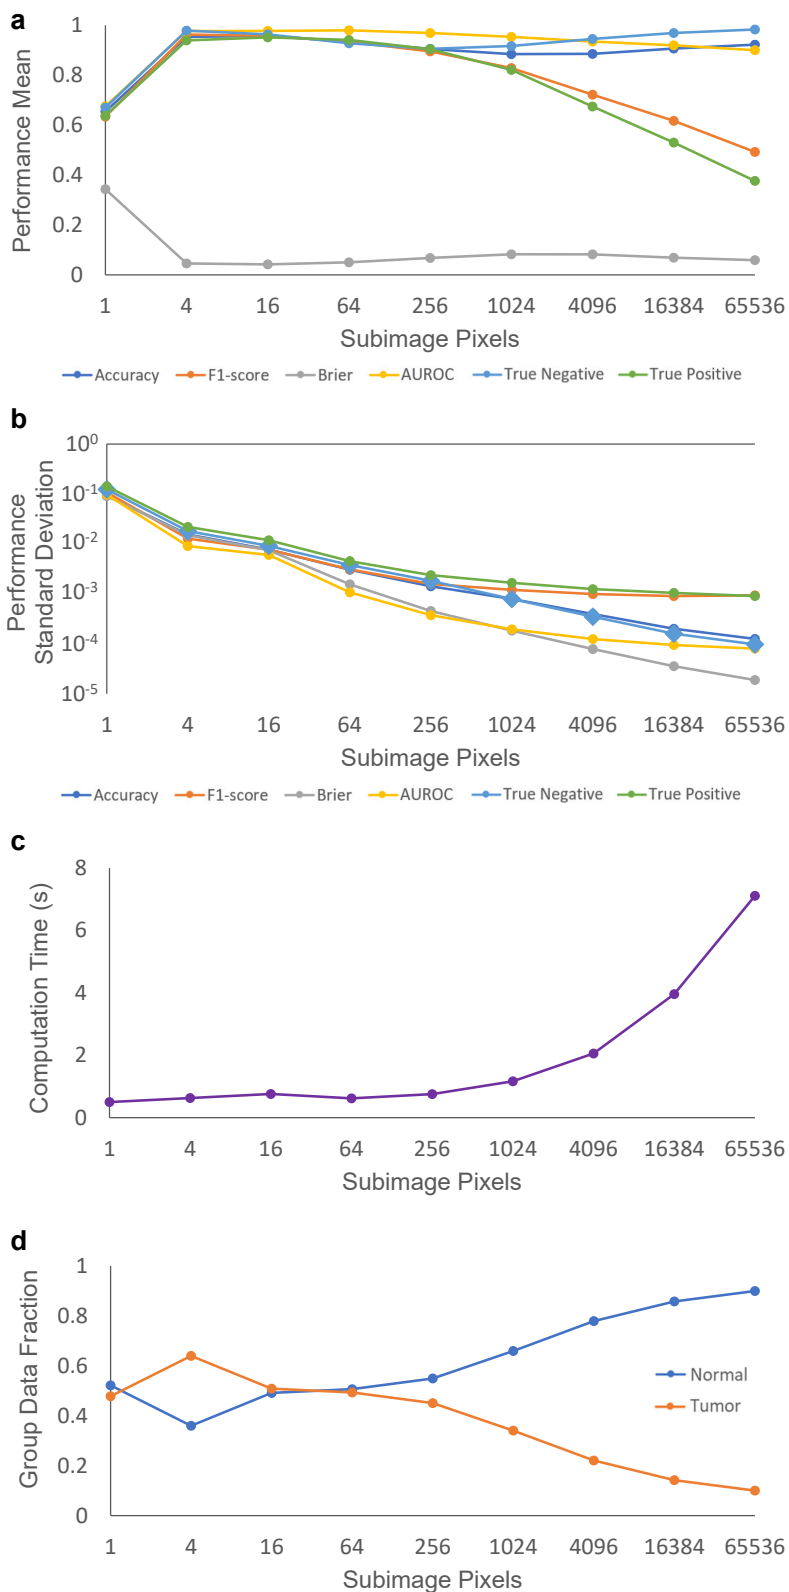

Figure 2: **Subdivision level optimization.**

a, The mean of threshold-dependent metrics (accuracy, true positive and negative rates, and F1-score) and threshold-independent metrics (area under the receiver operating characteristic (AUROC) and Brier score) are calculated at various subdivision levels. b, Standard deviation of the performance metrics is computed to highlight classification stability at various subdivisions. It is evident stability increases rapidly with subdivision levels. c, Classification computation time increases quickly with subdivision levels beyond 256. d, Group data size disparity results from disproportionate omission of tumor sub-images with sparse collagen content, thus lacking SHG signal. This disparity has a direct effect on the true positive rate and the F1-score, as shown in a.

131 We determined the range of 4 to 64 sub-images per image was an acceptable subdivision level,  
 132 possessing lowest Brier score and largest AUROC, and > 90% F1-score and true positive rate.  
 133 Computation times are the lowest in this range, and the group size disparity is minimal, since



134 normal and tumor groups each possess close to 50% of the training dataset (with the exception of  
135 4 sub-images per image, in which case there are more tumor data points than normal which  
136 contributes to maintaining a high true positive rate). It is important to note that the classifier  
137 stability increases quickly to acceptable levels with the number of sub-images per image, reaching  
138  $< 5\%$  at 64 sub-images per image. For reasons stated above, 64 sub-images per image is chosen as  
139 the optimal subdivision level for classification of normal and tumor breast tissue in the  
140 manuscript.

## 141 References

- 142 [1] Samim, M., Krouglov, S., & Barzda, V. Double stokes mueller polarimetry of second-harmonic  
143 generation in ordered molecular structures. *J. Opt. Soc. Am. B* **32**, 451-461 (2015).
- 144 [2] Chipman, R. A. et al. *Handbook of Optics Ch. 15* (McGraw-Hill, New York, 1995).
- 145 [3] Chipman, R. A. et al. *Handbook of Optics Ch. 14* (McGraw-Hill, New York, 1995).
- 146 [4] Mostaço-Guidolin, L. et al. Evaluation of texture parameters for the quantitative description  
147 of multimodal nonlinear optical images from atherosclerotic rabbit arteries. *Phys. Med. Biol.*  
148 **56**(16), 5319–5334 (2011)
- 149 [5] Mostaço-Guidolin, L. et al. Collagen morphology and texture analysis: from statistics to  
150 classification. *Sci. Rep.* **3**(1), 2190–2190 (2013)
- 151 [6] Golaraei, A. et al. Polarimetric second-harmonic generation microscopy of the hierarchical  
152 structure of collagen in stage I-III non-small cell lung carcinoma. *Biomed. Opt. Express* **11**,  
153 1851 (2020).
- 154 [7] Haralick R.M., Shanmugam K. & Dinstein Its'hak. Textural features for image classification.  
155 *IEEE Trans. Syst. Man Cybern.* **SMC-3**, 610-621 (1973).
- 156 [8] Freedman, D. & Diaconis, P. On the histogram as a density estimator:L 2 theory. *Probab.*  
157 *Theory Relat. Fields* **57**(4), 453-476 (1981).

- 158 [9] Hastie, T., Tibshirani, R., & Friedman, J. *The elements of statistical learning: data mining,*  
159 *inference, and prediction.* (Springer, New York, 2017).
- 160 [10] Brier, G. Verification of forecasts expressed in terms of probability. *Mon. Weather Rev.* **78**(1),  
161 1-3 (1950).
- 162 [11] Hanley, J.A. & McNeil, B.J. The meaning and use of the area under a receiver operating  
163 characteristic (ROC) curve. *Radiology* **143**(1), 29-36 (1982).
